# Supplementary material
Source: PubMed Central journal article supplement (PMC2897133)
Supplement: NIHMS201388-supplement-1_si_001.pdf [file NIHMS201388-supplement-1_si_001.pdf]

The Influence of the Oxygen Atom Acceptor on the Reaction Coordinate and Mechanism  
of Oxygen Atom Transfer From the Dioxo-Mo(VI) Complex,  $\text{Tp}^{i\text{Pr}}\text{MoO}_2(\text{OPh})$ , to  
Tertiary Phosphines

Partha Basu<sup>\*a</sup>, Brian W. Kail,<sup>a</sup> and Charles G. Young<sup>b</sup>

<sup>a</sup> Department of Chemistry and Biochemistry, Duquesne University, Pittsburgh, PA  
15282. <sup>b</sup> School of Chemistry, University of Melbourne, Victoria 3010, Australia.

Supporting Information.

**Contents:**

**Table S1.** <sup>31</sup>P chemical shifts (ppm) for complexes (**2a-2g**), the free phosphine and free phosphine oxide.

**Table S2.** Selected <sup>1</sup>H NMR data (for the *i*-Pr and 5-methine protons of  $\text{Tp}^{i\text{Pr}}$ ) for **2a-2g**.

**Table S3a.** Rate constants for the reaction of  $\text{Tp}^{i\text{Pr}}\text{MoO}_2(\text{OPh})$  with  $\text{PMe}_3$  in MeCN.

**Table S3b.** Rate constants for the reaction of  $\text{Tp}^{i\text{Pr}}\text{MoO}_2(\text{OPh})$  with  $\text{PMe}_2\text{Ph}$  in MeCN.

**Table S3c.** Rate constants for the reaction of  $\text{Tp}^{i\text{Pr}}\text{MoO}_2(\text{OPh})$  with  $\text{PEt}_2\text{Ph}$  in MeCN.

**Table S3d.** Rate constants for the reaction of  $\text{Tp}^{i\text{Pr}}\text{MoO}_2(\text{OPh})$  with  $\text{PBu}^n_3$  substrate measured in MeCN.

**Table S3e.** Rate constants for the reaction of  $\text{Tp}^{i\text{Pr}}\text{MoO}_2(\text{OPh})$  with  $\text{PEtPh}_2$  in MeCN.

**Table S4a.** Rate constants for the solvolysis reaction of  $\text{Tp}^{i\text{Pr}}\text{MoO}(\text{OPh})(\text{OPMe}_3)$  in MeCN.

**Table S4b.** Rate constants for the solvolysis reaction of  $\text{Tp}^{i\text{Pr}}\text{MoO}(\text{OPh})(\text{OPMe}_2\text{Ph})$  in MeCN.

**Table S4c.** Rate constants for the solvolysis reaction of  $\text{Tp}^{i\text{Pr}}\text{MoO}(\text{OPh})(\text{OPEt}_2\text{Ph})$  in MeCN.

**Table S4d.** Rate constants for the solvolysis reaction of  $\text{Tp}^{i\text{Pr}}\text{MoO}(\text{OPh})(\text{OPEtPh}_2)$  in MeCN.

**Table S1.**  $^{31}\text{P}$  chemical shifts (ppm) for complexes (**2a-2g**), the free phosphine and free phosphine oxide.

| complexes                              | $\text{OPR}_3^{\text{F}}$ | $\text{PR}_3^{\text{F}}$ | $\text{Mo}(\text{OPR}_3)^{\text{C}}$ | $\Delta(\text{PR}_3^{\text{F}} - \text{Mo}(\text{OPR}_3)^{\text{C}})$ | $\Delta(\text{OPR}_3^{\text{F}} - \text{Mo}(\text{OPR}_3)^{\text{C}})$ |
|----------------------------------------|---------------------------|--------------------------|--------------------------------------|-----------------------------------------------------------------------|------------------------------------------------------------------------|
| $\text{OPMe}_3$ ( <b>2a</b> )          | 35.6                      | -62.0                    | 64.0                                 | -126                                                                  | -28.4                                                                  |
| $\text{OPMe}_2\text{Ph}$ ( <b>2b</b> ) | 28.9                      | -46.9                    | 58.4                                 | -105.3                                                                | -29.5                                                                  |
| $\text{OPEt}_3$ ( <b>2c</b> )          | 48.3                      | -20.4                    | 74.9                                 | -95.3                                                                 | -26.6                                                                  |
| $\text{OPEt}_2\text{Ph}$ ( <b>2d</b> ) | 42.1                      | -15.1                    | 64.8                                 | -79.9                                                                 | -22.7                                                                  |
| $\text{OPBu}^n_3$ ( <b>2e</b> )        | 45.5                      | -32.2                    | 74.4                                 | -106.6                                                                | -28.9                                                                  |
| $\text{OPMePh}_2$ ( <b>2f</b> )        | 32.4                      | -10.8                    | 72.8                                 | -83.6                                                                 | -40.4                                                                  |
| $\text{OPEtPh}_2$ ( <b>2g</b> )        | 31.9                      | -12.0                    | 43.2                                 | -55.2                                                                 | -11.3                                                                  |

F and C indicate free phosphine (or free phosphine oxide) and coordinated phosphine oxide.

**Table S2.** Selected  $^1\text{H}$  NMR data (for the *i*-Pr and 5-methine protons of  $\text{Tp}^{\text{iPr}}$ ) for **2a-2g**.

| Complex   | CH ( <i>i</i> -Pr <sup>1</sup> ) | CH ( <i>i</i> -Pr <sup>2</sup> ) | CH ( <i>i</i> -Pr <sup>3</sup> ) | CH <sup>1</sup> | CH <sup>2</sup> | CH <sup>3</sup> |
|-----------|----------------------------------|----------------------------------|----------------------------------|-----------------|-----------------|-----------------|
| <b>2a</b> | 2.73                             | 4.09                             | 4.41                             | 5.84            | 5.99            | 6.30            |
| <b>2b</b> | 3.46                             | 4.02                             | 4.79                             | 6.44            | 6.70            | 6.70            |
| <b>2c</b> | 3.11                             | 3.69                             | 4.29                             | 6.06            | 6.27            | 6.43            |
| <b>2d</b> | 2.72                             | 4.17                             | 4.34                             | 5.87            | 5.98            | 6.02            |
| <b>2e</b> | 2.61                             | 4.23                             | 4.45                             | 5.87            | 5.96            | 6.01            |
| <b>2f</b> | 3.46                             | 4.02                             | 4.60                             | 5.89            | 6.21            | 6.23            |
| <b>2g</b> | 3.46                             | 4.02                             | 4.60                             | 6.46            | 6.70            | 6.78            |

**Table S3a.** Rate constants for the reaction of  $\text{Tp}^{\text{iPr}}\text{MoO}_2(\text{OPh})$  with  $\text{PMe}_3$  in MeCN.

| Temp (°C) | Temp, T (K) | 1/T (K <sup>-1</sup> ) | k (M <sup>-1</sup> sec <sup>-1</sup> ) | k·10 <sup>5</sup> (sec <sup>-1</sup> ) |
|-----------|-------------|------------------------|----------------------------------------|----------------------------------------|
| 5         | 278.15      | 0.003595               | 0.0165                                 | 6.02                                   |
| 11        | 284.15      | 0.003519               | 0.0609                                 | 22.2                                   |
| 16.5      | 289.65      | 0.003452               | 0.141                                  | 51.4                                   |
| 22.5      | 295.65      | 0.003382               | 0.252                                  | 92.0                                   |
| 38        | 311.15      | 0.003214               | 0.651                                  | 237.1                                  |

**Table S3b.** Rate constants for the reaction of  $\text{Tp}^{\text{iPr}}\text{MoO}_2(\text{OPh})$  with  $\text{PMe}_2\text{Ph}$  in MeCN.

| Temp (°C) | Temp, T (K) | 1/T (K <sup>-1</sup> ) | k (M <sup>-1</sup> sec <sup>-1</sup> ) | k·10 <sup>5</sup> (sec <sup>-1</sup> ) |
|-----------|-------------|------------------------|----------------------------------------|----------------------------------------|
| 5.9       | 279.05      | 0.003584               | 0.0896                                 | 32.2                                   |
| 12.5      | 285.65      | 0.003501               | 0.135                                  | 48.4                                   |
| 18        | 291.15      | 0.003435               | 0.218                                  | 78.5                                   |
| 22.5      | 295.65      | 0.003382               | 0.258                                  | 92.6                                   |

**Table S3c.** Rate constants for the reaction of  $\text{Tp}^{\text{iPr}}\text{MoO}_2(\text{OPh})$  with  $\text{PEt}_2\text{Ph}$  in MeCN.

| Temp (°C) | Temp, T (K) | 1/T (K <sup>-1</sup> ) | k (M <sup>-1</sup> sec <sup>-1</sup> ) | k·10 <sup>5</sup> (sec <sup>-1</sup> ) |
|-----------|-------------|------------------------|----------------------------------------|----------------------------------------|
| 10        | 283.15      | 0.003532               | 0.0183                                 | 6.59                                   |
| 17.5      | 290.65      | 0.003441               | 0.0367                                 | 13.2                                   |
| 23.5      | 296.65      | 0.003371               | 0.0793                                 | 28.5                                   |
| 28        | 301.15      | 0.003321               | 0.0983                                 | 35.3                                   |

**Table S3d.** Rate constants for the reaction of  $\text{Tp}^{\text{iPr}}\text{MoO}_2(\text{OPh})$  with  $\text{PBu}^n_3$  substrate measured in MeCN.

| Temp (°C) | Temp, T (K) | 1/T (K <sup>-1</sup> ) | k (M <sup>-1</sup> sec <sup>-1</sup> ) | k·10 <sup>5</sup> (sec <sup>-1</sup> ) |
|-----------|-------------|------------------------|----------------------------------------|----------------------------------------|
| 13        | 286.15      | 0.003495               | 0.0148                                 | 5.27                                   |
| 16        | 289.15      | 0.003458               | 0.0166                                 | 5.94                                   |
| 21        | 294.15      | 0.0034                 | 0.0397                                 | 14.2                                   |
| 26        | 299.15      | 0.003343               | 0.0850                                 | 30.4                                   |
| 32        | 305.15      | 0.003277               | 0.1114                                 | 39.8                                   |

**Table S3e.** Rate constants for the reaction of  $\text{Tp}^{\text{iPr}}\text{MoO}_2(\text{OPh})$  with  $\text{PEtPh}_2$  in MeCN.

| Temp (°C) | Temp, T (K) | 1/T (K <sup>-1</sup> ) | k (M <sup>-1</sup> sec <sup>-1</sup> ) | k·10 <sup>5</sup> (sec <sup>-1</sup> ) |
|-----------|-------------|------------------------|----------------------------------------|----------------------------------------|
| 15.5      | 288.65      | 0.003464               | 0.0048                                 | 1.73                                   |
| 22.5      | 295.65      | 0.003382               | 0.0102                                 | 3.65                                   |
| 28.5      | 301.65      | 0.003315               | 0.0219                                 | 8.18                                   |
| 35        | 308.15      | 0.003245               | 0.0420                                 | 15.66                                  |

**Table S4a.** Rate constants (uncorrected) for the solvolysis reaction of  $\text{Tp}^{\text{iPr}}\text{MoO}(\text{OPh})(\text{OPMe}_3)$  in MeCN.

| Temp (°C) | Temp, T (K) | 1/T (K <sup>-1</sup> ) | k·10 <sup>5</sup> (M <sup>-1</sup> sec <sup>-1</sup> ) |
|-----------|-------------|------------------------|--------------------------------------------------------|
| 26        | 299.15      | 0.003343               | 23.4                                                   |
| 32        | 305.15      | 0.003277               | 44.6                                                   |
| 38        | 311.15      | 0.003214               | 49.0                                                   |
| 43        | 316.15      | 0.003163               | 89.1                                                   |

**Table S4b.** Rate constants(uncorrected) for the solvolysis reaction of  $\text{Tp}^{\text{iPr}}\text{MoO}(\text{OPh})(\text{OPMe}_2\text{Ph})$  in MeCN.

| Temp (°C) | Temp, T (K) | 1/T (K <sup>-1</sup> ) | k·10 <sup>5</sup> (M <sup>-1</sup> sec <sup>-1</sup> ) |
|-----------|-------------|------------------------|--------------------------------------------------------|
| 5.9       | 279.05      | 0.003584               | 8.43                                                   |
| 11.5      | 284.65      | 0.003513               | 25.19                                                  |
| 18        | 291.15      | 0.003435               | 62.54                                                  |
| 22.5      | 295.65      | 0.003382               | 124.50                                                 |

**Table S4c.** Rate constants (uncorrected) for the solvolysis reaction of  $\text{Tp}^{\text{iPr}}\text{MoO}(\text{OPh})(\text{OPEt}_2\text{Ph})$  in MeCN.

| Temp (°C) | Temp, T (K) | 1/T (K <sup>-1</sup> ) | k·10 <sup>5</sup> (M <sup>-1</sup> sec <sup>-1</sup> ) |
|-----------|-------------|------------------------|--------------------------------------------------------|
| 0         | 273.15      | 0.003661               | 8.63                                                   |
| 4         | 277.15      | 0.003608               | 32.08                                                  |
| 10        | 283.15      | 0.003532               | 73.81                                                  |
| 17.5      | 290.65      | 0.003441               | 105.82                                                 |
| 23.5      | 296.65      | 0.003371               | 222.52                                                 |
| 26        | 299.15      | 0.003343               | 676.67                                                 |
| 28        | 301.15      | 0.003321               | 599.52                                                 |

**Table S4d.** Rate constants (uncorrected) for the solvolysis reaction of  $\text{Tp}^{\text{iPr}}\text{MoO}(\text{OPh})(\text{OPEtPh}_2)$  in MeCN.

| Temp (°C) | Temp, T (K) | 1/T (K <sup>-1</sup> ) | k·10 <sup>5</sup> (M <sup>-1</sup> sec <sup>-1</sup> ) |
|-----------|-------------|------------------------|--------------------------------------------------------|
| 10        | 283.15      | 0.003532               | 85.30                                                  |
| 16        | 289.15      | 0.003458               | 157.38                                                 |
| 20        | 293.15      | 0.003411               | 383.14                                                 |
| 31.5      | 304.65      | 0.003282               | 610.50                                                 |
